# Supplementary material for: Identifying G6PC3 as a Potential Key Molecule in Hypoxic Glucose Metabolism of Glioblastoma Derived from the Depiction of 18F-Fluoromisonidazole and 18F-Fluorodeoxyglucose Positron Emission Tomography
Source: Hindawi journal article supplement (doi:10.1155/2024/2973407), 2024-02-28

Figure. S1

(a)

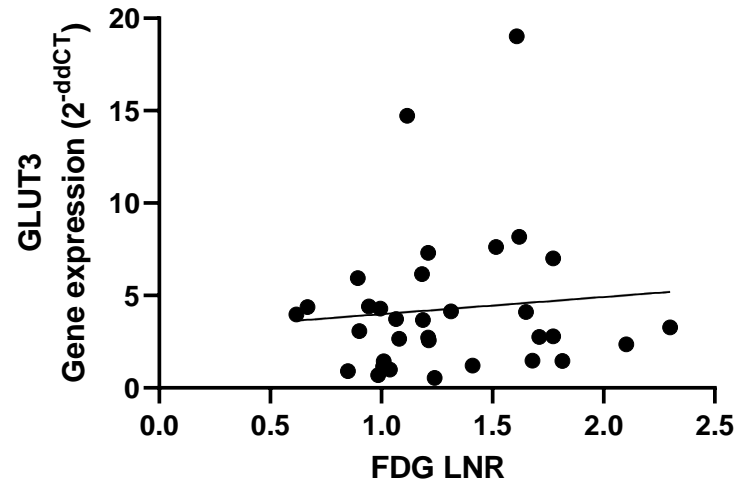

(b)

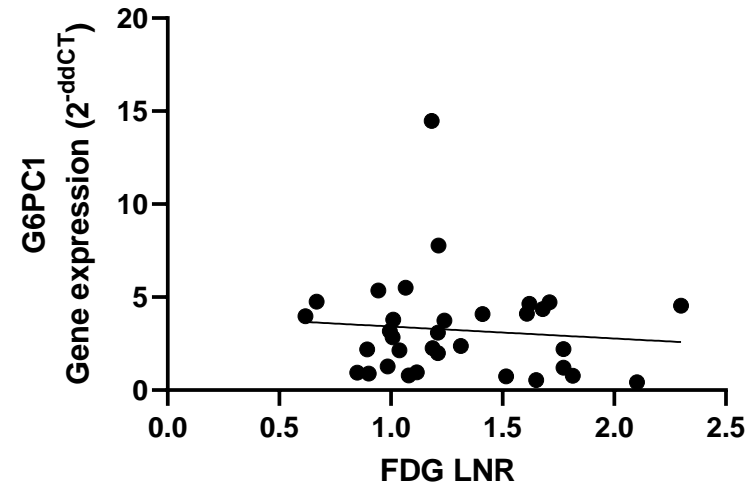

(c)

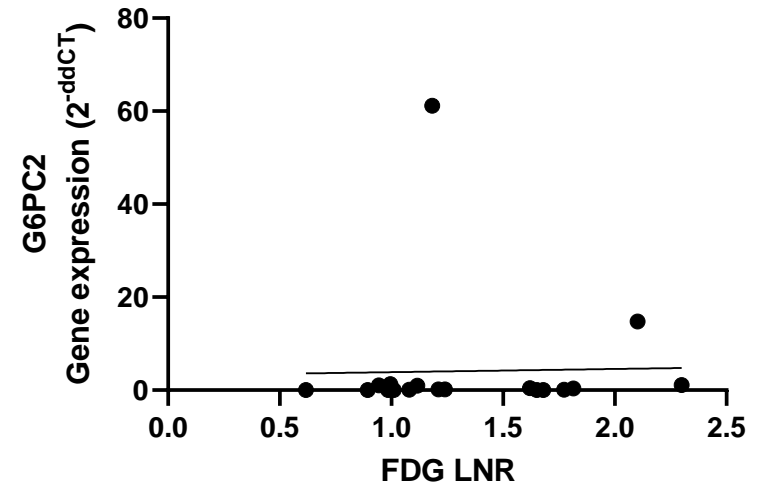

(d)

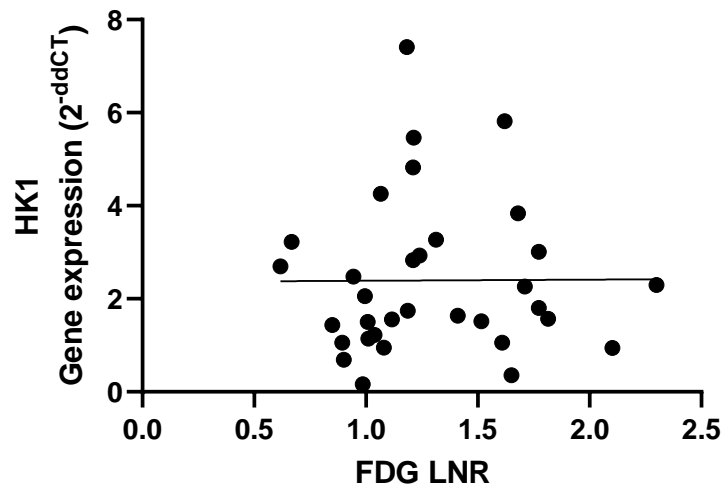

(e)

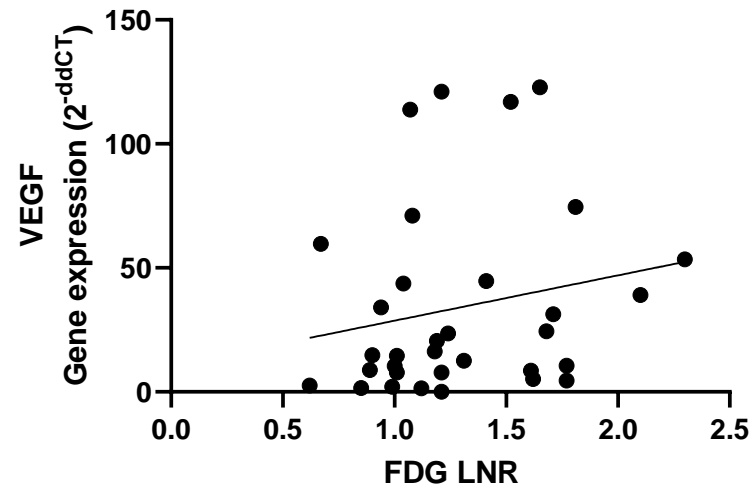

(f)

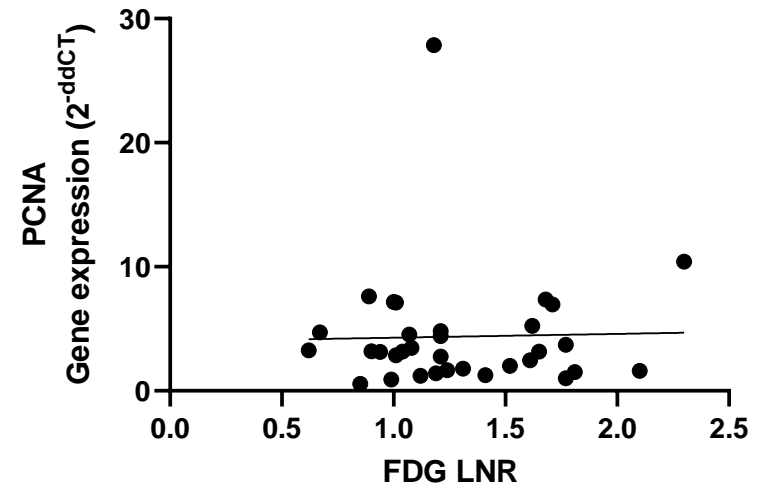

Supplement: f1 [file 2973407.f1.pdf]
