# Supplementary material for: Identifying G6PC3 as a Potential Key Molecule in Hypoxic Glucose Metabolism of Glioblastoma Derived from the Depiction of 18F-Fluoromisonidazole and 18F-Fluorodeoxyglucose Positron Emission Tomography
Source: Hindawi journal article supplement (doi:10.1155/2024/2973407), 2024-02-28

Figure. S2

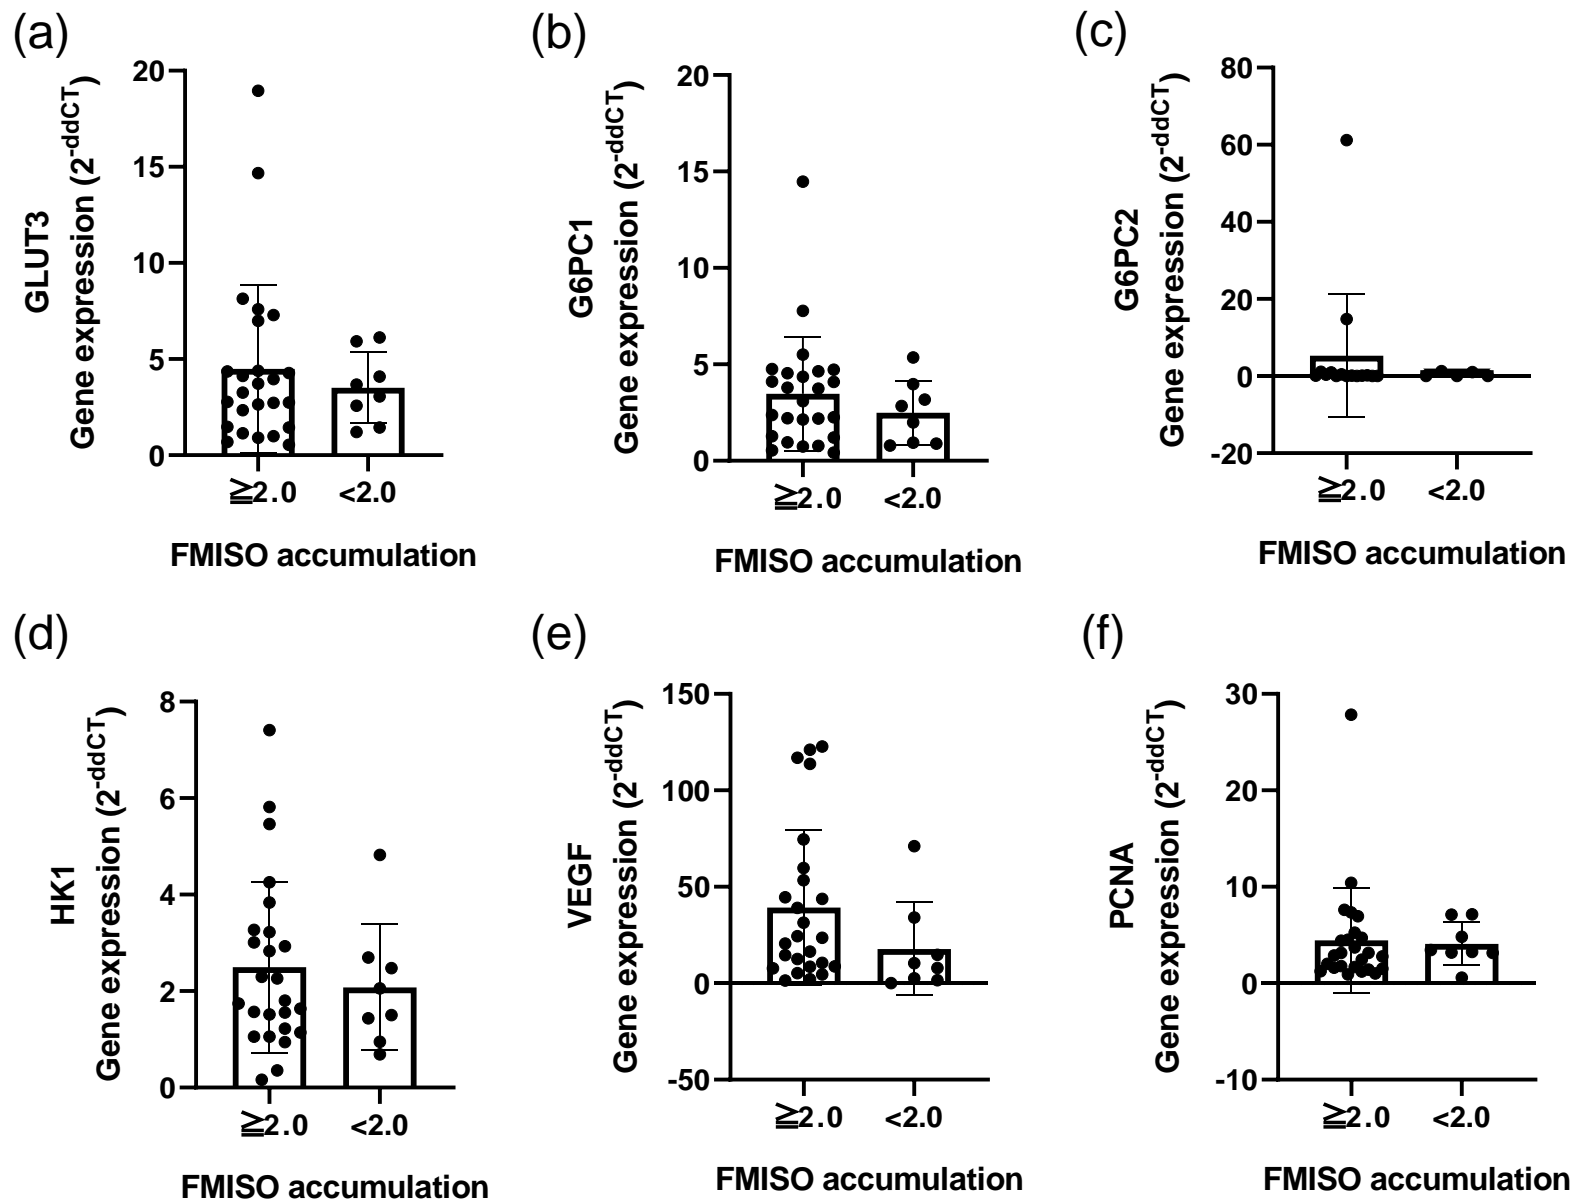

Supplement: f2 [file 2973407.f2.pdf]
